# Supplementary material for: Acute and Chronic Sarcoid Arthropathies: Characteristics and Treatments From a Retrospective Nationwide French Study
Source: PubMed Central journal article supplement (PMC7758528; doi:10.3389/fmed.2020.565420), 2020-12-10
Supplement: Table_1.pdf [file Table_1.pdf]

| <b>Characteristics</b>                                                 | <b>All lines of treatment<br/>N = 25</b> | <b>Steroids<br/>N = 6</b>         | <b>Hydroxychloroquine<br/>N = 4</b> | <b>Methotrexate<br/>N = 10</b>    | <b>Infliximab<br/>N = 5</b>      |
|------------------------------------------------------------------------|------------------------------------------|-----------------------------------|-------------------------------------|-----------------------------------|----------------------------------|
| <b>Tender joints before/at the end of each line of treatment</b>       | 6 [1-8]<br>0 [0-12]*                     | 6 [1-8]<br>0 [0-2]*               | 1 [0-4]<br>0 [0-1]                  | 5 [2-12]<br>3.5 [0-8]*            | 6 [0-8]<br>0 [0-12]              |
| <b>Swollen joints before / at the end of each line of treatment</b>    | 2 [1-6]<br>0 [0-3]*                      | 1.5 [1-6]<br>0 [0-1]*             | 0 [0-2]<br>0 [0-1]                  | 2 [0-6]<br>0 [0-3]*               | 2 [0-6]<br>0 [0-2]               |
| <b>DAS 44 -CRP before/at the end of each line of treatment</b>         | 3.3 [2.76-3.62]<br>1.06 [0.9-1.17]*      | 3.21 [2.76-3.78]<br>1 [0.9-1.13]* | 2.46[2.17-2.75]<br>1.15[1.07-1.17]  | 3.33 [2.8-3.9]<br>1.07 [0.9-1.4]* | 4.1 [3.8-4.2]<br>1.6 [1.6-1.8]** |
| <b>Prednisone (mg/day) before/at the end of each line of treatment</b> | 10 [5-80]<br>1.5 [0-50]*                 | 40 [5-70]<br>0 [0-50]*            | 2.5 [0-5]<br>1 [0-5]                | 10 [5-80]<br>2.5 [0-10]*          | 7.5 [5-10]<br>0 [0-5]*           |

\*p<0.05 (no statistical analysis for hydroxychloroquine subgroup because of small number of patients)
